# Supplementary material
Source: MDPI journal article supplement (https://www.mdpi.com/2313-0105/9/7/387)
Supplement: s1 [file s1]

## Supporting Information

### Cu(II)/polydopamine-modified glass fiber separators towards high-performance zinc-ion batteries

Fengcan Ma, Kaixuan Xie, Siheng Wu, Chi Zhang, Xiaodie Liao, and Qinghong Wang\*

*School of Chemistry and Materials Science, Jiangsu Normal University, Xuzhou 221116, China*

\*Correspondence: wangqh@jsnu.edu.cn

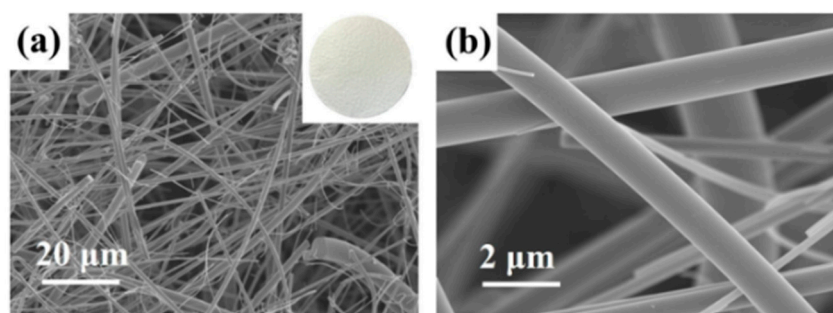

**Figure S1.** (a, b) SEM images of pristine GF separator. Insert in (a) is the photo of pristine GF.

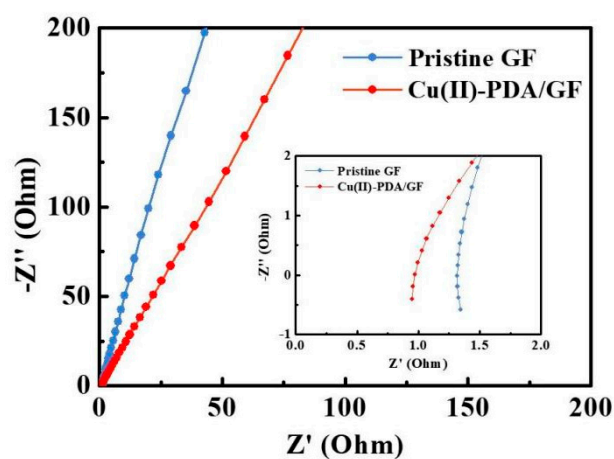

**Figure S2.** EIS test of the stainless steel//stainless steel cells with different separators.

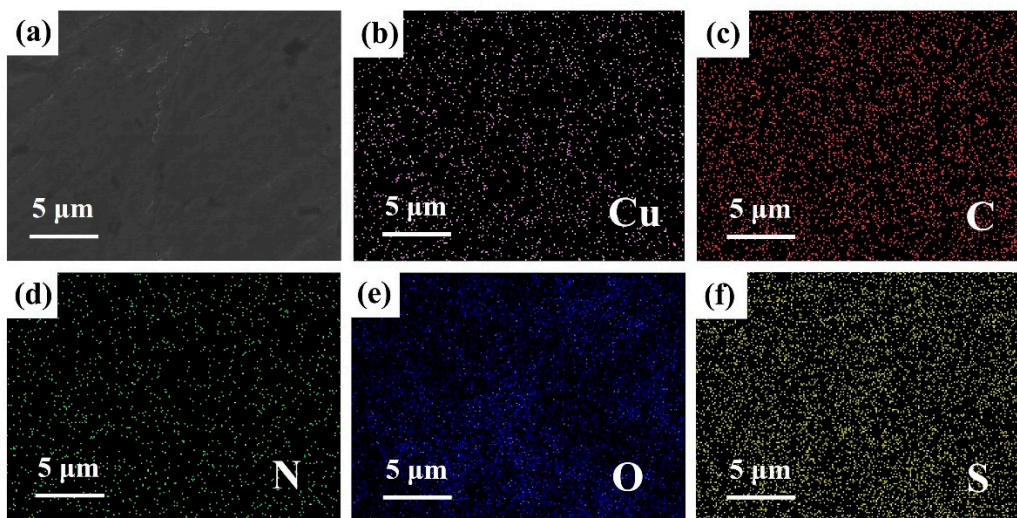

**Figure S3.** EDS images of Zn foils after Zn deposition for 10 min at the current density of  $1 \text{ mA cm}^{-2}$  in the symmetric cells using Cu(II)-PDA/GF separator.

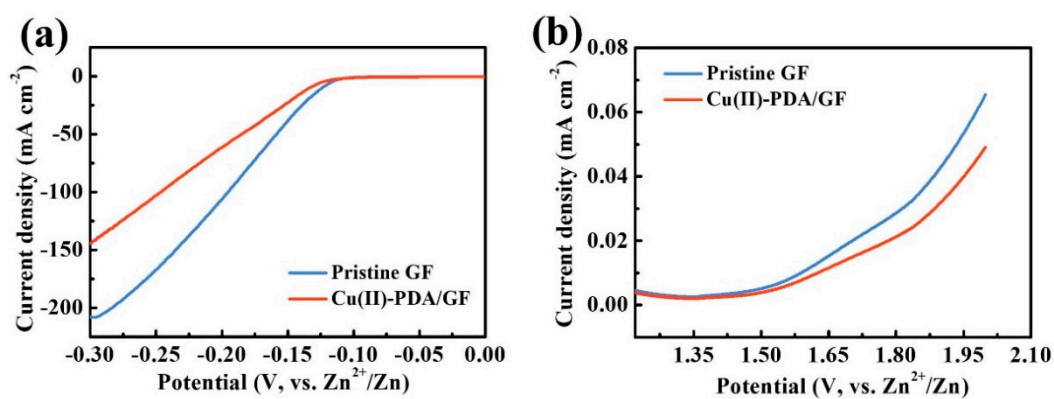

**Figure S4.** Electrochemical stability windows of Zn//Ti cells with pristine GF and Cu(II)-PDA/GF separator. (a) and (b) LSV curves measured at a scan rate of  $1 \text{ mV s}^{-1}$ .

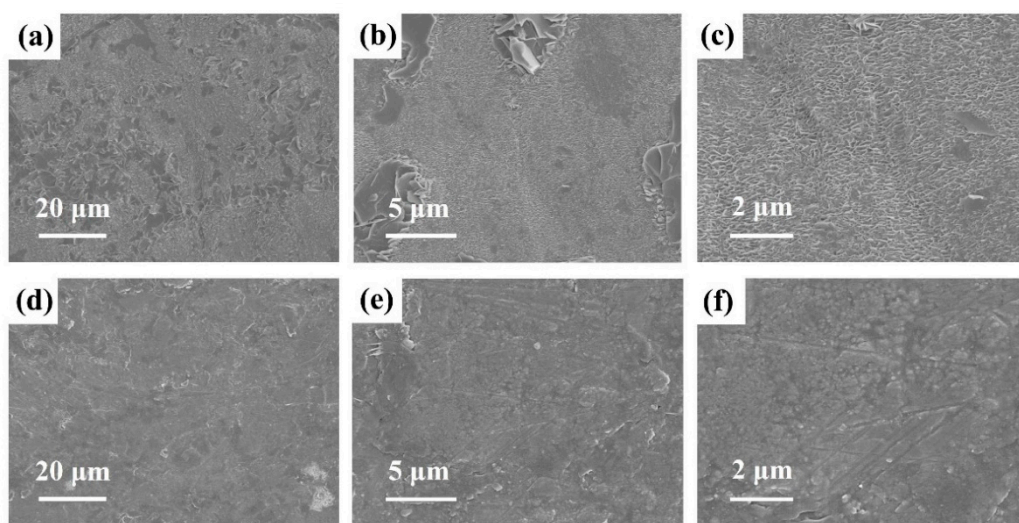

**Figure S5.** The SEM images of zinc foils after assembled with pristine GF separator (a–c) and Cu(II)-PDA/GF separator (d–f) for 48h.

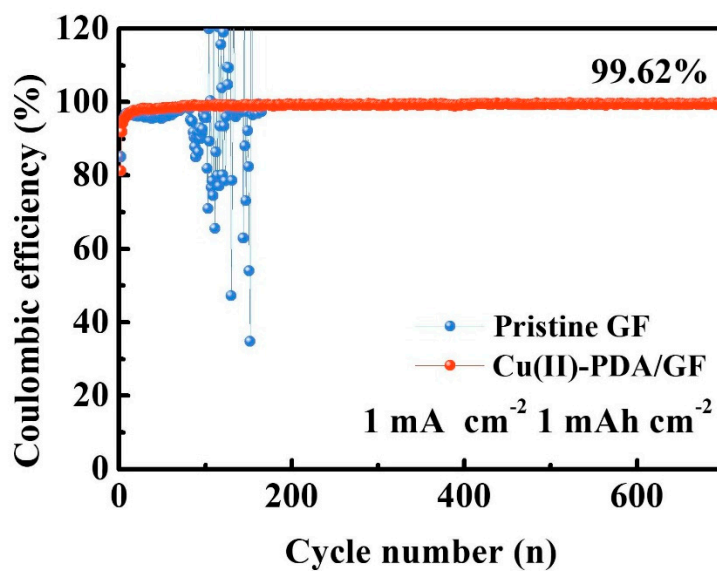

**Figure S6.** Coulombic efficiency of Zn plating/stripping on Cu at the current density of  $1 \text{ mA cm}^{-2}$  with the fixed capacity of  $1 \text{ mAh cm}^{-2}$  in Cu//Zn cells with different separators.

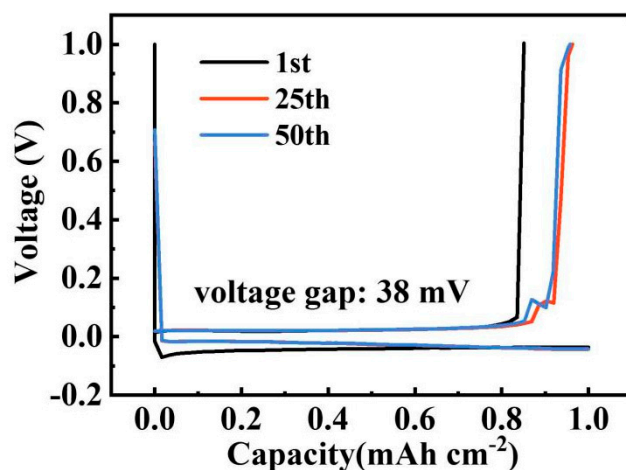

**Figure S7.** Voltage and capacity distribution of Cu//Zn cells with pristine GF separator.

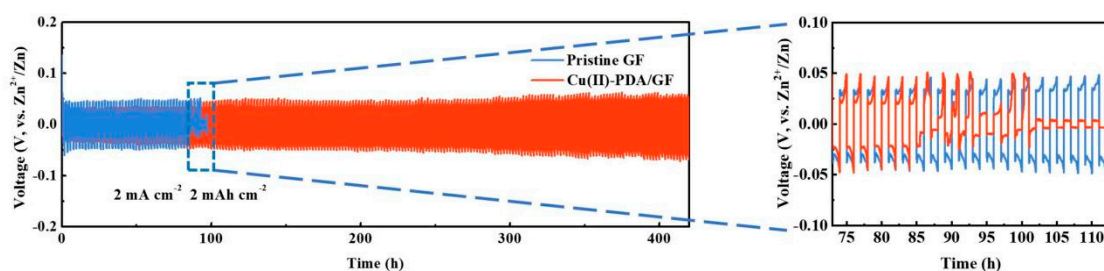

**Figure S8.** Cycling performance of the symmetrical cells with pristine GF and Cu(II)-PDA/GF separator at the current density of  $2 \text{ mA cm}^{-2}$  with the fixed capacity of  $2 \text{ mAh cm}^{-2}$ .

**Table S1.** Data for GF and Cu-PDA/GF separators obtained from electrolyte absorption experiments.

| Separators                 | GF      | Cu(II)-PDA/GF |
|----------------------------|---------|---------------|
| Wa(g)                      | 0.02491 | 0.02419       |
| Wb(g)                      | 0.4085  | 0.5644        |
| Electrolyte absorption (%) | 1540    | 2234          |

**Table S2.** A comparative table of this result with other same or different separators based ZIBs performance.

| Strategies                                                      | Areal current<br>(mA cm <sup>-2</sup> ) | Areal capacity<br>(mAh cm <sup>-2</sup> ) | Life<br>(h) | Ref.      |
|-----------------------------------------------------------------|-----------------------------------------|-------------------------------------------|-------------|-----------|
| Cu/PDA-GF                                                       | 1                                       | 1                                         | 1800        | This work |
| PVDF@PDA nanofibrous separator                                  | 2                                       | 1                                         | 200         | 1         |
| NaZnF <sub>3</sub> and Nafion/cotton textile                    | 0.5                                     | 0.5                                       | 300         | 2         |
| Persimmon branch carbon/filter paper                            | 1                                       | 0.5                                       | 320         | 3         |
| Ti <sub>3</sub> C <sub>2</sub> T <sub>x</sub> MXene/glass fiber | 1                                       | 1                                         | 1100        | 4         |
| Nano-hydroxyapatite/bacterial cellulose                         | 1                                       | 1                                         | 1600        | 5         |
| N-doped carbon/glass fiber                                      | 1                                       | 1                                         | 1100        | 6         |
| Cellulose-SO <sub>3</sub> Zn separator                          | 1                                       | 0.5                                       | 100         | 7         |
| C/Cu nanocomposite/cellulose nanofiber                          | 1                                       | 0.5                                       | 2000        | 8         |
| ZSM-5 molecular sieve separator                                 | 1                                       | 1                                         | 2000        | 9         |
| g-C <sub>3</sub> N <sub>4</sub> coated separator                | 3                                       | 1                                         | 600         | 10        |
| Vertical graphene/glass fiber                                   | 0.5                                     | 0.5                                       | 300         | 11        |
| CF separator                                                    | 1                                       | 1                                         | 2000        | 12        |
| Zn-Nafion separator                                             | 0.5                                     | 5                                         | 550         | 13        |
| UiO-66-GF                                                       | 2                                       | 1                                         | 350         | 14        |

## References

1. Liu, Y.; Liu, S.; Xie, X.; Li, Z.; Wang, P.; Lu, B.; Liang, S.; Tang, Y.; Zhou, J. A Functionalized Separator Enables Dendrite-Free Zn Anode via Metal-Polydopamine Coordination Chemistry. *Infomat* **2023**, *5*, e12374.
2. Guo, G.; Tan, X.; Wang, K.; Zheng, L.; Zhang, H. Regulating Zinc Deposition Behaviors by Functional Cotton Textiles as Separators for Aqueous Zinc-Metal Batteries. *J. Power Sources* **2023**, *553*, 232321.
3. Li, L.; Peng, J.; Jia, X.; Zhu, X.; Meng, B.; Yang, K.; Chu, D.; Yang, N.; Yu, J. PBC@Cellulose-Filter Paper Separator Design with Efficient Ion Transport Properties toward Stabilized Zinc-Ion Battery. *Electrochim. Acta* **2022**, *430*, 141129.
4. Su, Y.; Liu, B.; Zhang, Q.; Peng, J.; Wei, C.; Li, S.; Li, W.; Xue, Z.; Yang, X.; Sun, J. Printing-Scalable Ti<sub>3</sub>C<sub>2</sub>T<sub>x</sub> MXene-Decorated Janus Separator with Expedited Zn<sup>2+</sup> Flux toward Stabilized Zn Anodes. *Adv. Funct. Mater.* **2022**, *32*, 2204306.
5. Qin, H.; Chen, W.; Kuang, W.; Hu, N.; Zhang, X.; Weng, H.; Tang, H.; Huang, D.; Xu, J.; He, H. A Nature-Inspired Separator with Water-Confined and Kinetics-Boosted Effects for Sustainable and High-Utilization Zn Metal Batteries. *Small* **2023**, 2300130.
6. Yang, X.; Li, W.; Lv, J.; Sun, G.; Shi, Z.; Su, Y.; Lian, X.; Shao, Y.; Zhi, A.; Tian, X.; Bai, X.; Liu, Z.; Sun, J. In Situ Separator Modification via CVD-Derived N-doped Carbon for Highly Reversible Zn Metal Anodes. *Nano Res.* **2022**, *15*, 9785-9791.

7. Ge, X.; Zhang, W.; Song, F.; Xie, B.; Li, J.; Wang, J.; Wang, X.; Zhao, J.; Cui, G. Single-Ion-Functionalized Nanocellulose Membranes Enable Lean-Electrolyte and Deeply Cycled Aqueous Zinc-Metal Batteries. *Adv. Funct. Mater.* **2022**, *32*, 2200429.
8. Li, Y.; Peng, X.; Li, X.; Duan, H.; Xie, S.; Dong, L.; Kang, F. Functional Ultrathin Separators Proactively Stabilizing Zinc Anodes for Zinc-Based Energy Storage. *Adv. Mater.* **2023**, *35*, 2300019.
9. Zhu, J.; Bie, Z.; Cai, X.; Jiao, Z.; Wang, Z.; Tao, J.; Song, W.; Fan, H. J. A Molecular-Sieve Electrolyte Membrane enables Separator-Free Zinc Batteries with Ultra long Cycle Life. *Adv. Mater.* **2022**, *34*, 2207209.
10. Yang, Y.; Chen, T.; Yu, B.; Zhu, M.; Meng, F.; Shi, W.; Zhang, M.; Qi, Z.; Zeng, K.; Xue, J. Manipulating Zn-ion Flux by Two-Dimensional Porous g-C<sub>3</sub>N<sub>4</sub> Nanosheets for Dendrite-Free Zinc Metal Anode. *Chem. Eng. J.* **2022**, *433*, 134077.
11. Li, C.; Sun, Z.; Yang, T.; Yu, L.; Wei, N.; Tian, Z.; Cai, J.; Lv, J.; Shao, Y.; Rummeli, M.H.; Sun, J.; Liu, Z. Directly Grown Vertical Graphene Carpets as Janus Separators toward Stabilized Zn Metal Anodes. *Adv. Mater.* **2020**, *32*, 2003425.
12. Zhou, W.; Chen, M.; Tian, Q.; Chen, J.; Xu, X.; Wong, C.-P. Cotton-Derived Cellulose Film as A Dendrite-Inhibiting Separator to Stabilize the Zinc Metal Anode of Aqueous Zinc Ion Batteries. *Energy Stor. Mater.* **2022**, *44*, 57-65.
13. Wu, B.; Wu, Y.; Lu, Z.; Zhang, J.; Han, N.; Wang, Y.; Li, X.-M.; Lin, M.; Zeng, L. A Cation Selective Separator Induced Cathode Protective Layer and Regulated Zinc Deposition for Zinc Ion Batteries. *J. Mater. Chem. A* **2021**, *9*, 4734-4743.
14. Song, Y.; Ruan, P.; Mao, C.; Chang, Y.; Wang, L.; Dai, L.; Zhou, P.; Lu, B.; Zhou, J.; He, Z. Metal-Organic Frameworks Functionalized Separators for Robust Aqueous Zinc-Ion Batteries. *Nanomicro Lett* **2022**, *74*, 104880.
